# Supplementary material for: Mechanistic insight into the nucleation and growth of oleic acid capped lead sulphide quantum dots
Source: Royal Society of Chemistry journal article supplement (doi:10.1039/c6cp02119k), 2016-01-01
Supplement: c6cp02119k1.pdf [file c6cp02119k1.pdf]

## Supporting Information

### **Mechanistic insight into the nucleation and growth of oleic acid capped lead sulphide quantum dots**

*Aabhash Shrestha<sup>a</sup>, Nigel A. Spooner<sup>b,c</sup>, Shi Zhang Qiao<sup>a\*</sup>, and Sheng Dai<sup>a\*</sup>*

<sup>a</sup>School of Chemical Engineering, The University of Adelaide, Adelaide, SA, 5005, Australia

<sup>b</sup>School of Physical Sciences, Department of Physics, The University of Adelaide, SA 5005, Australia

<sup>c</sup>DST Group, PO Box 1500, Edinburg, SA 5111, Australia

Corresponding authors: [s.dai@adelaide.edu.au](mailto:s.dai@adelaide.edu.au), [s.qiao@adelaide.edu.au](mailto:s.qiao@adelaide.edu.au)

## Supporting results

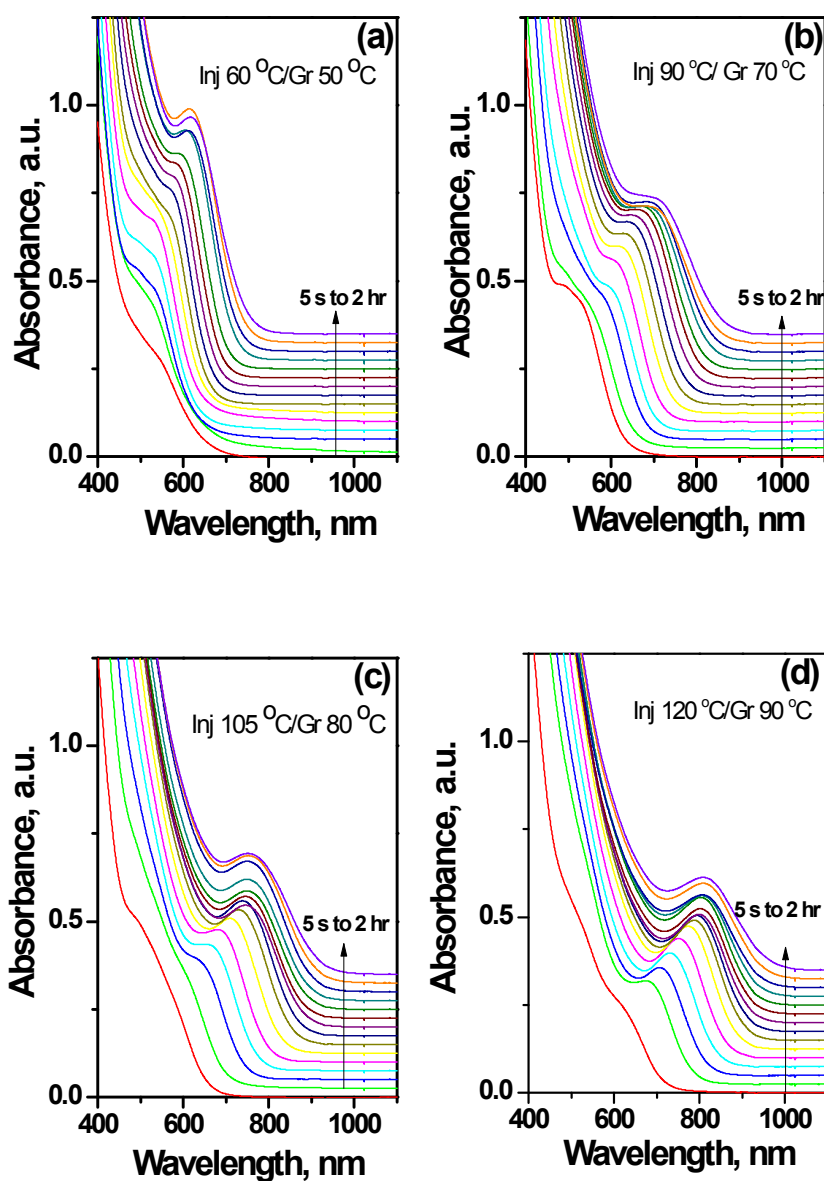

**Figure S1.** Temporal evolution of the absorption spectra of PbS QDs synthesized at various injection and growth temperatures.

(The wavelengths of the 1<sup>st</sup> exciton peak gradually increase with time indicating the increase in particle sizes. The particle sizes increase rapidly during the initial stage of the growth and gradually saturates as reaction time prolongs. The growth of the QDs ceases once the particle size reached optimal sizes)

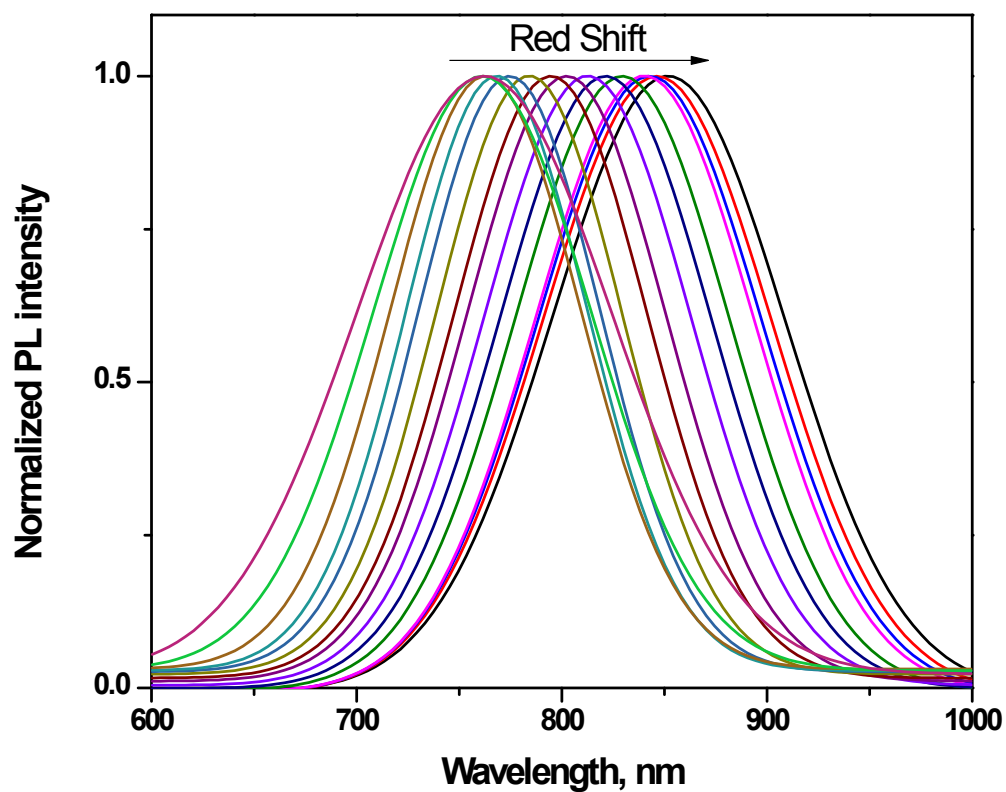

**Figure S2.** Photoluminescence (PL) spectra of PbS QDs. Synthesis condition - OA:Pb:S = 4:2:1, Injection temperature 90 °C and Growth temperature 70 °C.

(The red-shift of the PL peak indicates the increase in particle sizes).

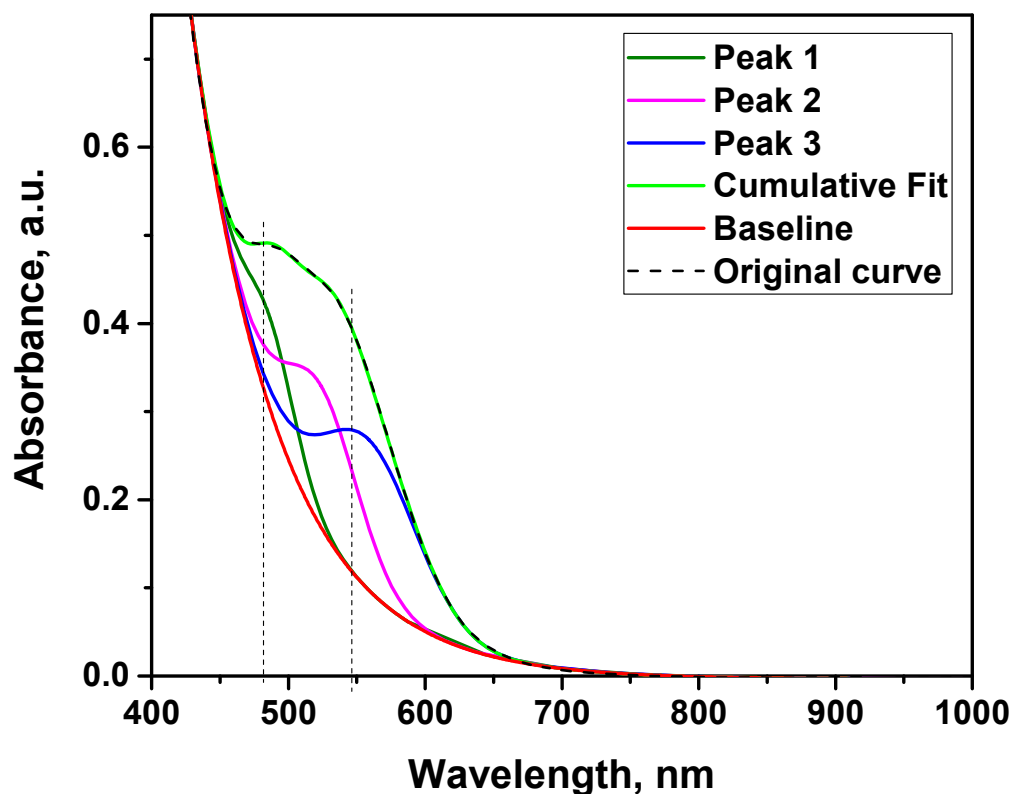

**Figure S3.** Peak fitting procedure to determine initial nuclei sizes.

(The absorbance spectra for 5 s aliquot for 90 °C injection and 70 °C growth condition was fitted to three Gaussian curves using the Origin Pro© software to determine the various nuclei sizes<sup>[1]</sup> Considering the bulk lattice parameter of PbS to be  $\sim 0.69$  nm,<sup>[2]</sup> the various nuclei sizes were chosen to constitute 8-10 structural units per particle. For example, the nuclei with absorbance at  $\sim 480$  nm (i.e. 1.4 nm particle diameter) would constitute 8 structural units of PbS per particle).

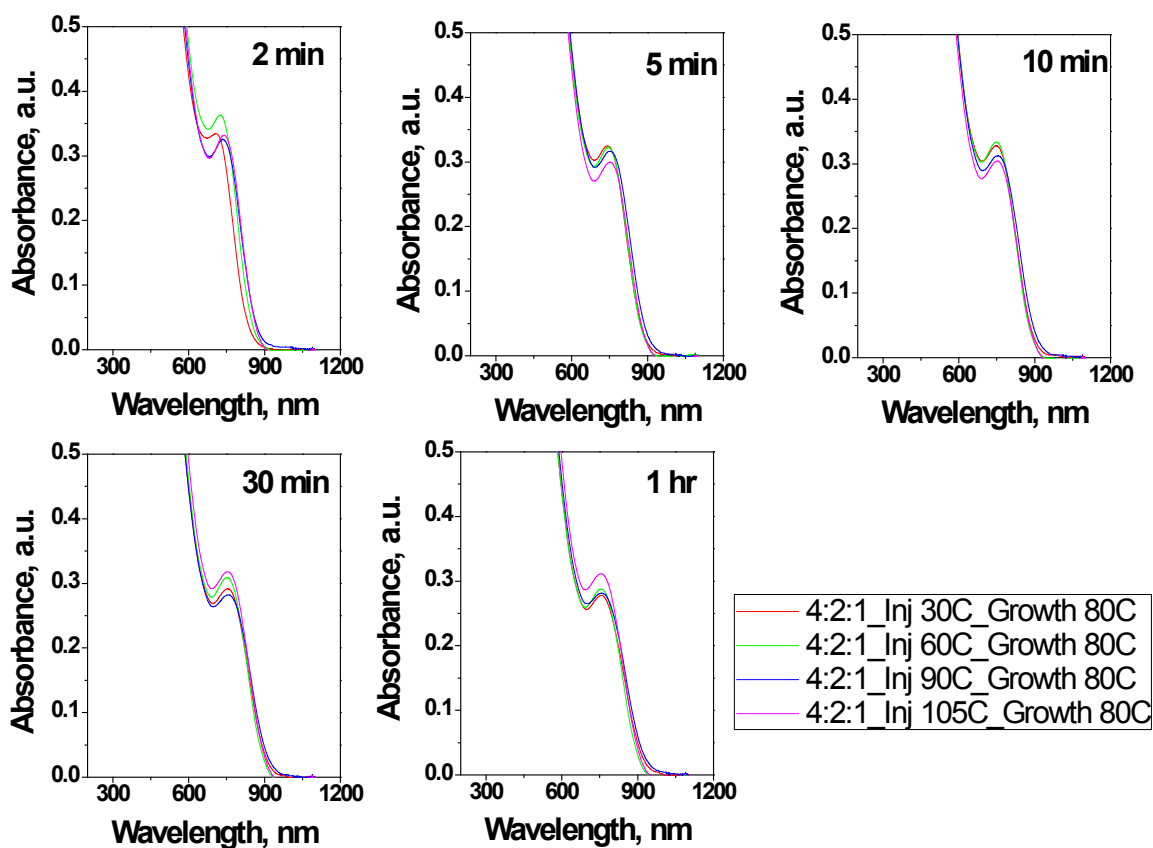

**Figure S4.** Absorption spectra for PbS QDs synthesis - different injection temperatures while maintaining the same growth temperature.

(The exciton peaks for all conditions saturate to the same position indicating the independence of nucleating temperatures on the final size of PbS QDs.)

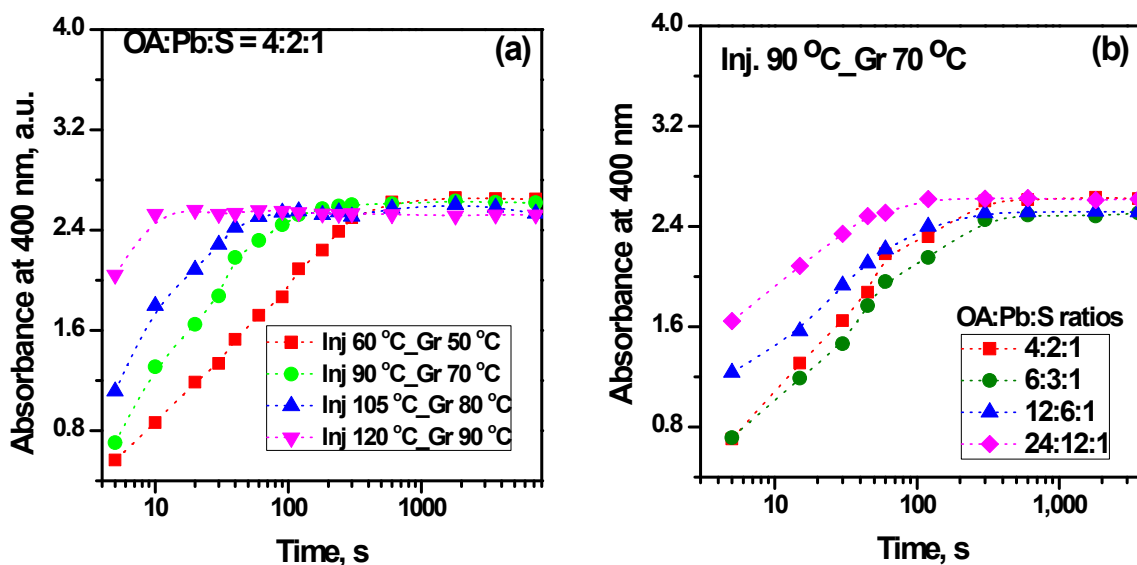

**Figure S5.** Temporal evolution of PbS QDs absorbance at 400 nm (a) at various injection and growth temperatures while the precursor ratio is maintained at OA:Pb:S=4:2:1 (b) at various ratios of lead precursor while keeping the same injection and growth temperatures (Injection temperature = 90 °C and Growth temperature = 70 °C growth). In both cases, the sulphur precursor concentration is kept the same.

(The formation of PbS QDs from precursor/monomers can be estimated from the absorbance spectra at 400 nm<sup>[2]</sup>. The molar extinction coefficient scales with nanocrystal volume at 400 nm and the precursor conversion to QDs can be estimated from the absorbance at 400 nm. We find that the higher temperature has a faster precursor conversion to QDs compared to lower temperature.)

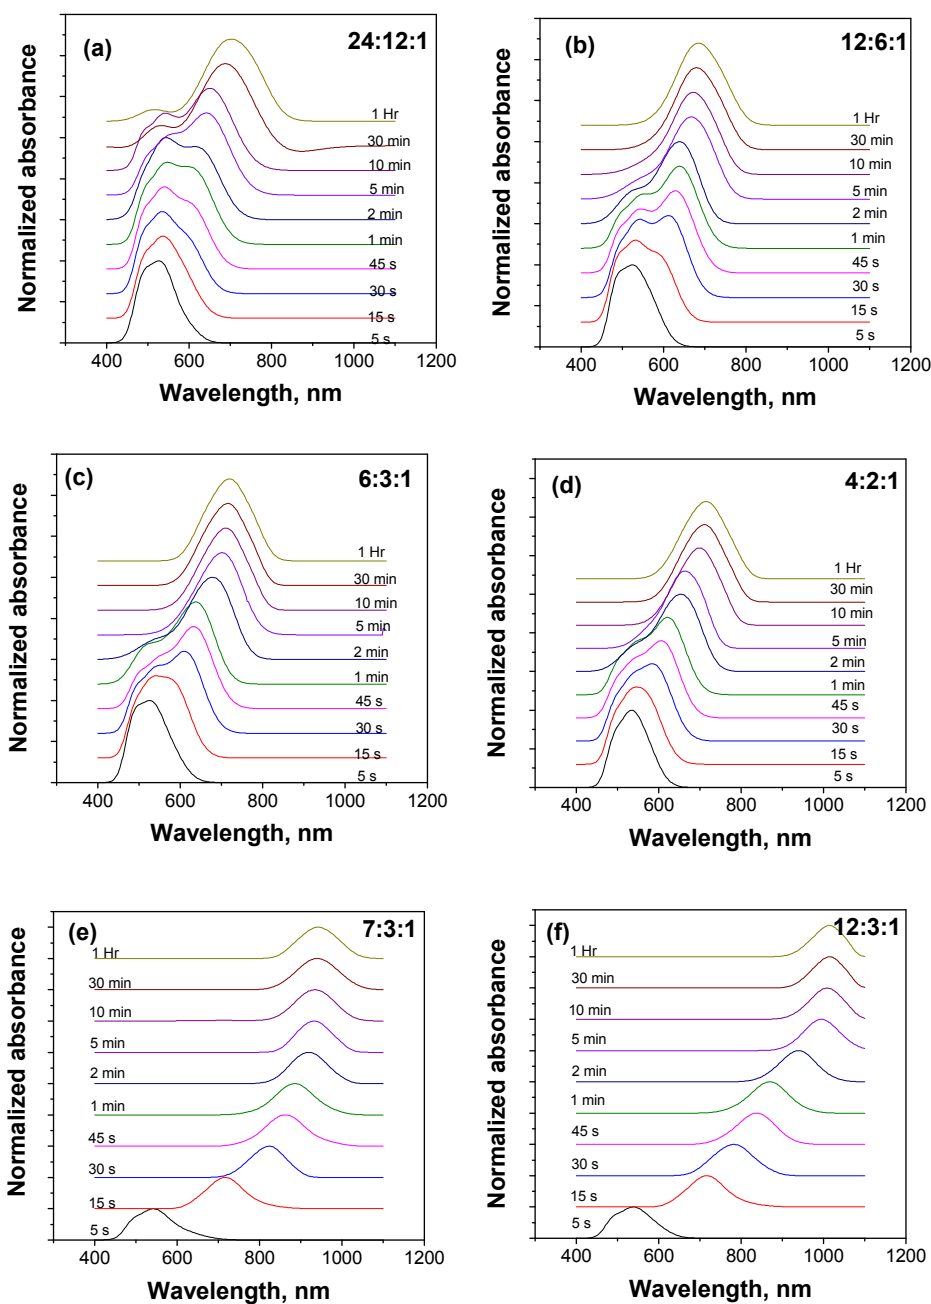

**Figure S6.** Absorption spectra fitting to a standard Gaussian distribution for various feed precursor ratios. Here, the precursor ratio are indicated as OA:Pb:S.

(The absorption spectra were fitted to the Gauss distribution using the curve fitting (spline function) in the Origin© software. It can be seen that at higher stoichiometric ratios OA:Pb forms the cluster of various sizes before focusing while in presence of free oleic acid i.e. at higher OA:Pb ratios no such clusters are formed.)

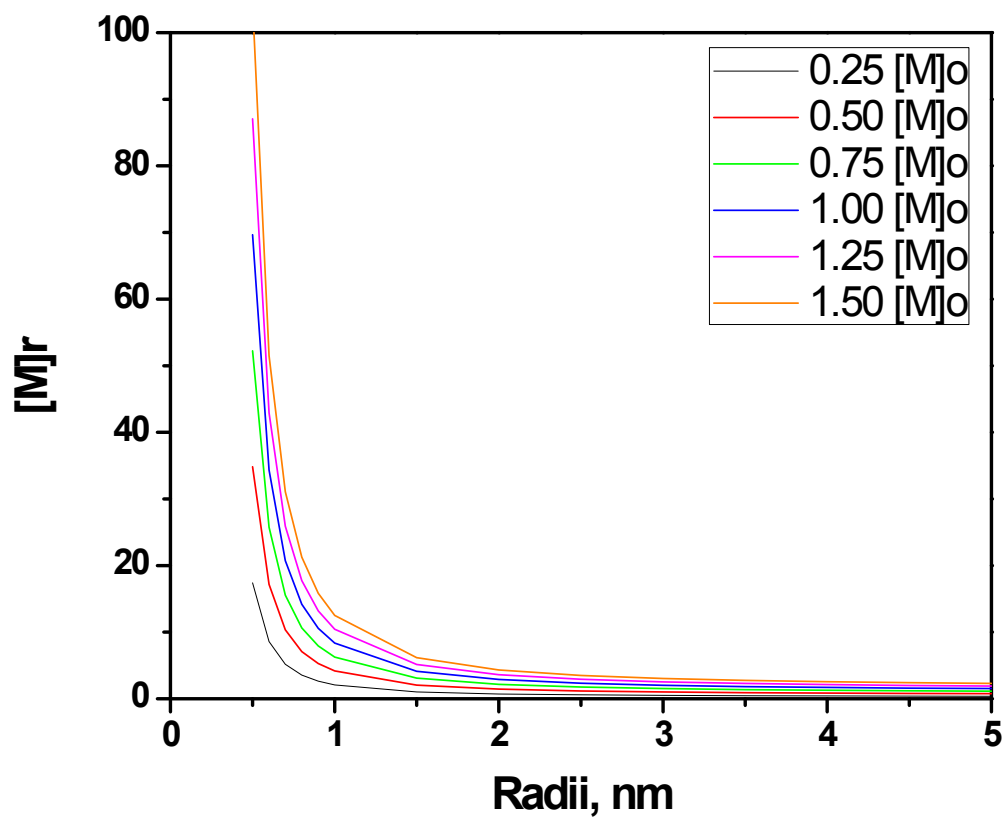

**Figure S7.** Change in solubility for various sized QDs particles with the change in equilibrium monomer solubility (Equation 3 main text).

(The simulation parameters are  $V_m = 3.15 \times 10^{-5} \text{ m}^3/\text{mol}$ ,  $\gamma = 0.125 \text{ J/m}^2$ , and  $R = 8.314 \text{ J/mol.K}$ .)



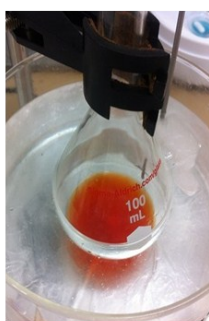

5 C

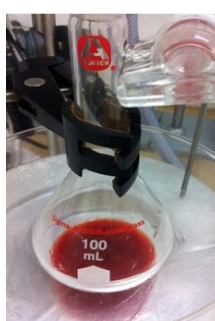

10 C

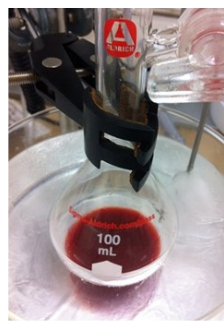

15 C

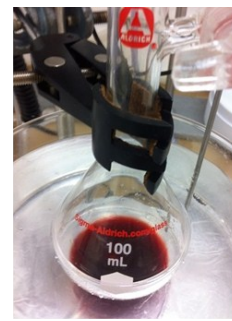

20 C

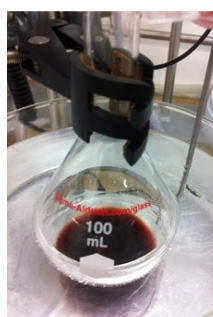

35 C

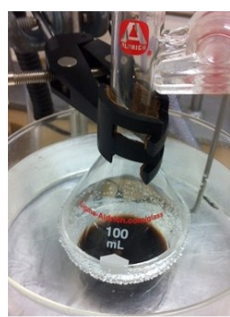

50 C

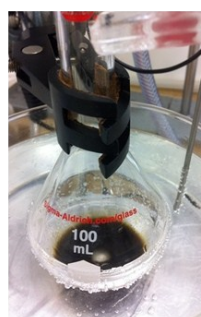

70 C

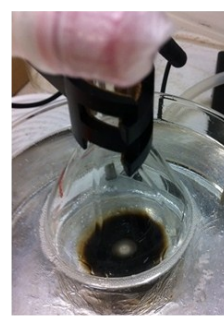

90 C

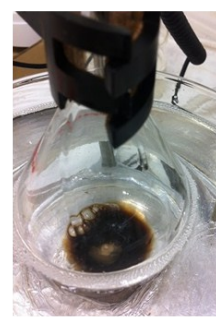

110 C

**Figure S8.** Snap shot of the synthesis of ultra-small PbS QDs at various growth temperatures

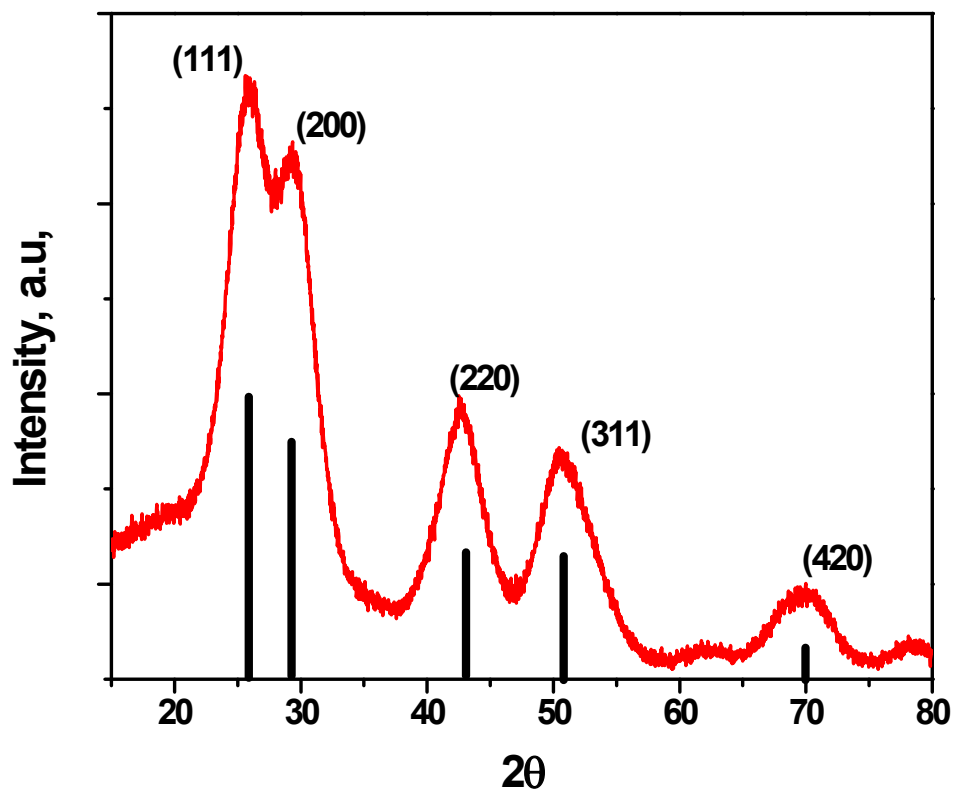

**Figure S9.** XRD spectra of ultra-small PbS QDs (~ 1.8 nm diameter and absorption peak at 600 nm)

**Table S1.** Designed experiments at various synthesis parameters. Each green shade indicates the reaction parameters (i.e. temperature and reactant ratios) used at a certain condition.

|                               | Feed ratio<br>(OA:Pb:S) | Injection (°C)/Growth temperature (°C) |              |             |             |             |             |             |
|-------------------------------|-------------------------|----------------------------------------|--------------|-------------|-------------|-------------|-------------|-------------|
|                               |                         | 120 °C/90 °C                           | 105 °C/80 °C | 90 °C/70 °C | 60 °C/50 °C | 90 °C/80 °C | 60 °C/80 °C | 30 °C/80 °C |
| Temperature Influence         | (4:2:1)                 |                                        |              |             |             |             |             |             |
| Lead precursor Influence      | (4:2:1)                 |                                        |              |             |             |             |             |             |
|                               | (6:3:1)                 |                                        |              |             |             |             |             |             |
|                               | (12:6:1)                |                                        |              |             |             |             |             |             |
|                               | (24:12:1)               |                                        |              |             |             |             |             |             |
| Oleic acid (Ligand) Influence | (6:3:1)                 |                                        |              |             |             |             |             |             |
|                               | (6.5:3:1)               |                                        |              |             |             |             |             |             |
|                               | (7:3:1)                 |                                        |              |             |             |             |             |             |
|                               | (9:3:1)                 |                                        |              |             |             |             |             |             |
|                               | (12:3:1)                |                                        |              |             |             |             |             |             |
| Sulphur precursor Influence   | (6:3:1)                 |                                        |              |             |             |             |             |             |
|                               | (6:3:0.5)               |                                        |              |             |             |             |             |             |
|                               | (6:3:1.5)               |                                        |              |             |             |             |             |             |

**Table S2.** Natural logarithmic, standard Ostwald ripening (OR) model and orientation attachment (OA) model fitting for the exciton peak at various temperature as a function of time (min) for OA:Pb:S as 4:2:1

| OA:Pb:S (4:2:1) |                  |             |             |                  |
|-----------------|------------------|-------------|-------------|------------------|
| Temperature, °C | OR model fitting |             |             | OA model fitting |
|                 | SSE,<br>n=2      | SSE,<br>n=3 | SSE,<br>n=4 | SSE              |
| 50 °C           | 0.0062           | 0.0017      | 0.0070      | 0.0544           |
| 70 °C           | 0.0264           | 0.0080      | 0.0337      | 0.1781           |
| 80 °C           | 0.0534           | 0.0185      | 0.0767      | 0.2797           |
| 90 °C           | 0.0745           | 0.0286      | 0.1174      | 0.3624           |

**Table S3.** Natural logarithmic, standard Ostwald ripening (OR) model and orientation attachment (OA) model fitting for the exciton peak at various temperature as a function of time (min) for OA:Pb:S as 5:2:1

| <b>OA:Pb:S (5:2:1)</b> |                         |                 |                 |                         |
|------------------------|-------------------------|-----------------|-----------------|-------------------------|
|                        | <b>OR model fitting</b> |                 |                 | <b>OA model fitting</b> |
| <i>Temperature, °C</i> | <i>SSE, n=2</i>         | <i>SSE, n=3</i> | <i>SSE, n=4</i> | <i>SSE</i>              |
| 24 °C                  | 0.0013                  | 0.0003          | 0.0014          | 0.0131                  |
| 40 °C                  | 0.0042                  | 0.0011          | 0.0046          | 0.0386                  |
| 50 °C                  | 0.0081                  | 0.0022          | 0.0093          | 0.0692                  |
| 60 °C                  | 0.0128                  | 0.0036          | 0.0153          | 0.1054                  |
| 70 °C                  | 0.0192                  | 0.0056          | 0.0236          | 0.1416                  |
| 80 °C                  | 0.0647                  | 0.0234          | 0.0966          | 0.2803                  |
| 90 °C                  | 0.0712                  | 0.0264          | 0.1088          | 0.2836                  |

**Table S4.** Natural logarithmic, standard Ostwald ripening (OR) model and orientation attachment (OA) model fitting for the exciton peak at various temperature as a function of time (min) for OA:Pb:S as 7:2:1

| <b>OA:Pb:S (7:2:1)</b> |                         |                 |                 |                         |
|------------------------|-------------------------|-----------------|-----------------|-------------------------|
|                        | <b>OR model fitting</b> |                 |                 | <b>OA model fitting</b> |
| <i>Temperature, °C</i> | <i>SSE, n=2</i>         | <i>SSE, n=3</i> | <i>SSE, n=4</i> | <i>SSE</i>              |
| 24 °C                  | 0.0039                  | 0.0010          | 0.0043          | 0.0360                  |
| 50 °C                  | 0.0266                  | 0.0081          | 0.0339          | 0.1784                  |
| 60 °C                  | 0.0327                  | 0.0103          | 0.0430          | 0.2047                  |
| 70 °C                  | 0.0587                  | 0.0205          | 0.0851          | 0.2508                  |
| 80 °C                  | 0.0638                  | 0.0231          | 0.0954          | 0.2939                  |
| 90 °C                  | 0.1030                  | 0.0432          | 0.1755          | 0.2427                  |

**Table S5.** Natural logarithmic, standard Ostwald ripening (OR) model and orientation attachment (OA) model fitting for the exciton peak at various temperature as a function of time (min) for OA:Pb:S as 10:2:1

| <b>OA:Pb:S (10:2:1)</b> |                         |                 |                 |                         |
|-------------------------|-------------------------|-----------------|-----------------|-------------------------|
|                         | <b>OR model fitting</b> |                 |                 | <b>OA model fitting</b> |
| <i>Temperature, °C</i>  | <i>SSE, n=2</i>         | <i>SSE, n=3</i> | <i>SSE, n=4</i> | <i>SSE</i>              |
| 24 °C                   | 0.0023                  | 0.0006          | 0.0025          | 0.0223                  |
| 40 °C                   | 0.0096                  | 0.0027          | 0.0112          | 0.0825                  |
| 70 °C                   | 0.0656                  | 0.0238          | 0.0984          | 0.2919                  |

## References

- [1] C. M. Evans, A. M. Love, E. A. Weiss, *Journal of the American Chemical Society* **2012**, *134*, 17298-17305.
- [2] I. Moreels, K. Lambert, D. Smeets, D. De Muynck, T. Nollet, J. C. Martins, F. Vanhaecke, A. Vantomme, C. Delerue, G. Allan, Z. Hens, *ACS Nano* **2009**, *3*, 3023-3030.
